# Supplementary material
Source: MDPI journal article supplement (https://www.mdpi.com/1999-4907/15/3/402)
Supplement: s1 [file s1]

# Supplementary materials

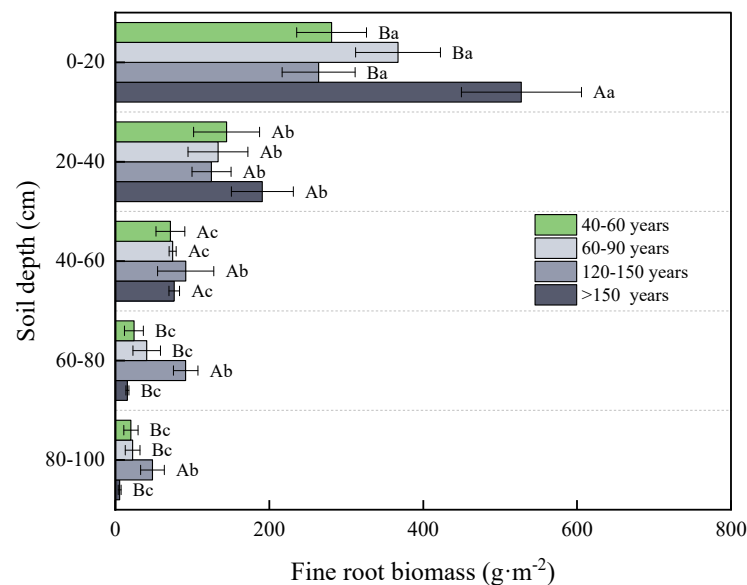

**Figure S1.** Fine root biomass and aboveground biomass of *Q. aliena* of different ages. Capital letters indicate significant different ages of *Q. aliena* in the same soil depth, and lowercase letters indicate significant difference for same age of *Q. aliena* in different soil depth ( $p < 0.05$ ).

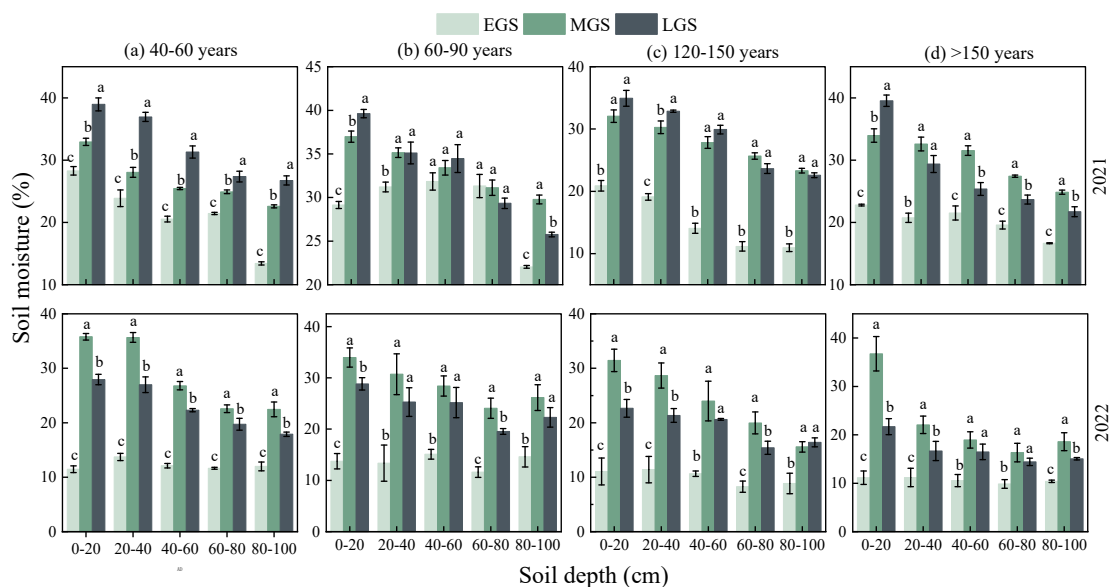

**Figure S2.** Vertical profile (0–100 cm) of soil moisture (%) of *Q. aliena* at different stand ages. Error bars represent one standard deviation ( $n = 3$ ). Lowercase letters indicate significant differences in soil moisture of the same soil depth at different growth stage ( $p < 0.05$ ).

**Table S1.** Soil properties and texture in *Q. aliena* of different ages.

|                                   | Layers (cm) | 40–60 Years     | 60–90 Years    | 120–150 Years  | >150 Years      |
|-----------------------------------|-------------|-----------------|----------------|----------------|-----------------|
| Bulk density (g·m <sup>-3</sup> ) | 0–20        | 1.14 ± 0.05 a   | 1.07 ± 0.01 a  | 1.11 ± 0.04 a  | 1.00 ± 0.02 b   |
|                                   | 20–40       | 1.20 ± 0.03 b   | 1.28 ± 0.04 a  | 1.28 ± 0.02 a  | 1.18 ± 0.01 b   |
|                                   | 40–60       | 1.61 ± 0.03 a   | 1.61 ± 0.02 a  | 1.33 ± 0.03 c  | 1.51 ± 0.03 b   |
|                                   | 60–80       | 1.72 ± 0.01 a   | 1.68 ± 0.04 a  | 1.46 ± 0.03 c  | 1.54 ± 0.04 b   |
|                                   | 80–100      | 1.73 ± 0.03 a   | 1.78 ± 0.03 a  | 1.63 ± 0.02 b  | 1.60 ± 0.01 b   |
| Total porosity (%)                | 0–20        | 48.11 ± 1.78 bc | 53.01 ± 1.62 a | 47.22 ± 2.03 c | 51.44 ± 1.68 ab |
|                                   | 20–40       | 48.29 ± 0.97 a  | 45.66 ± 1.79 a | 40.72 ± 1.52 b | 47.33 ± 1.94 a  |
|                                   | 40–60       | 40.58 ± 1.06 a  | 35.76 ± 1.13 b | 41.90 ± 2.64 a | 41.05 ± 2.45 a  |
|                                   | 60–80       | 33.44 ± 0.89 c  | 34.7 ± 0.49 c  | 39.35 ± 1.60 a | 36.97 ± 1.27 b  |

|                       | Layers<br>(cm) | 40–60 Years    | 60–90 Years     | 120–150 Years   | >150 Years      |
|-----------------------|----------------|----------------|-----------------|-----------------|-----------------|
|                       | 80–100         | 32.2 ± 0.52 b  | 30.1 ± 1.58 c   | 34.39 ± 0.39 a  | 35.30 ± 0.99 a  |
| Field capacity<br>(%) | 0–20           | 48.08 ± 1.71 c | 55.55 ± 1.16 a  | 41.94 ± 1.06 d  | 51.79 ± 1.75 b  |
|                       | 20–40          | 46.34 ± 2.39 a | 38.82 ± 1.23 b  | 30.73 ± 0.92 c  | 40.21 ± 2.02 b  |
|                       | 40–60          | 27.09 ± 0.82 b | 23.02 ± 1.31 c  | 31.92 ± 2.49 a  | 27.40 ± 1.16 b  |
|                       | 60–80          | 20.40 ± 0.97 c | 21.89 ± 0.93 bc | 29.22 ± 1.65 a  | 23.38 ± 0.49 b  |
|                       | 80–100         | 19.47 ± 0.94 a | 17.02 ± 0.92 a  | 24.53 ± 1.57 b  | 24.29 ± 2.18 b  |
| Clay<br>(%)           | 0–20           | 1.76 ± 0.96 a  | 0.54 ± 0.25 a   | 0.92 ± 0.10 a   | 1.83 ± 0.45 a   |
|                       | 20–40          | 1.95 ± 0.44 ab | 1.07 ± 0.23 bc  | 2.37 ± 0.96 a   | 0.30 ± 0.10 c   |
|                       | 40–60          | 1.83 ± 0.86 a  | 0.58 ± 0.11 b   | 0.99 ± 0.10 b   | 0.00 ± 0.00 b   |
|                       | 60–80          | 1.12 ± 0.08 a  | 0.30 ± 0.11 c   | 0.63 ± 0.32 b   | 0.00 ± 0.00 c   |
|                       | 80–100         | 0.00 ± 0.00 b  | 0.14 ± 0.07 b   | 0.94 ± 0.55 a   | 0.00 ± 0.00 b   |
| Silt<br>(%)           | 0–20           | 82.91 ± 2.26 a | 41.21 ± 3.52 b  | 49.89 ± 18.64 b | 84.93 ± 2.15 a  |
|                       | 20–40          | 85.66 ± 2.40 a | 78.48 ± 5.70 a  | 79.19 ± 2.39 a  | 59.36 ± 11.08 b |
|                       | 40–60          | 83.70 ± 2.11 a | 70.06 ± 3.04 ab | 61.85 ± 17.46 b | 3.81 ± 1.01 c   |
|                       | 60–80          | 75.83 ± 0.99 a | 51.33 ± 11.02 b | 35.62 ± 8.26 c  | 12.36 ± 2.05 d  |
|                       | 80–100         | 25.08 ± 2.75 b | 40.34 ± 7.56 a  | 47.01 ± 8.43 a  | 0.00 ± 0.00 c   |
| Sand<br>(%)           | 0–20           | 15.33 ± 3.20 b | 58.25 ± 3.50 a  | 49.19 ± 18.74 a | 13.24 ± 1.86 b  |
|                       | 20–40          | 12.39 ± 2.12 b | 20.46 ± 5.82 b  | 18.44 ± 3.23 b  | 40.34 ± 11.85 a |
|                       | 40–60          | 14.47 ± 1.33 c | 29.35 ± 3.15 bc | 37.16 ± 17.44 b | 96.19 ± 1.01 a  |
|                       | 60–80          | 23.06 ± 0.91 d | 48.37 ± 11.31 c | 63.75 ± 8.57 b  | 87.64 ± 2.05 a  |
|                       | 80–100         | 74.92 ± 2.75 b | 59.52 ± 7.63 c  | 52.06 ± 8.98 c  | 100.00 ± 0.00 a |

Note: Means ± standard deviations are shown, and different letters shown in the same row denote significant differences between the different forest age at  $p < 0.05$ .
